# Supplementary material for: Programmed cell death 1 forms negative costimulatory microclusters that directly inhibit T cell receptor signaling by recruiting phosphatase SHP2
Source: PubMed Central journal article supplement — J Exp Med. 2012 Jun 4;209(6):1201–17. doi: 10.1084/jem.20112741 (PMC3371732; doi:10.1084/jem.20112741), 2012-06-04
Supplement: supp_jem.20112741_JEM_20112741_sm.pdf [file supp_jem.20112741_JEM_20112741_sm.pdf]

## SUPPLEMENTAL MATERIAL

Yokosuka et al., <http://www.jem.org/cgi/content/full/jem.20112741/DC1>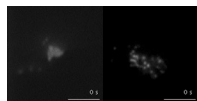

**Video 1. PD-1 forms clusters by PD-1–PD-L1 binding.** AND-Tg CD4<sup>+</sup> T cells expressing PD-1-EGFP were plated onto an MCC88-103 prepulsed planar bilayer containing I-E<sup>k</sup>-, ICAM-1-, and CD80- (left) plus PD-L1-GPI (right) and imaged by TIRF microscopy at every 2.5 s. Bars, 5 μm. A representative of five independent experiments is shown.
